# Supplementary material for: Excavation of Molecular Subtypes of Endometrial Cancer Based on DNA Methylation
Source: MDPI journal article supplement (doi:10.3390/genes13112106), 2022-11-13
Supplement: s1 [file s1]

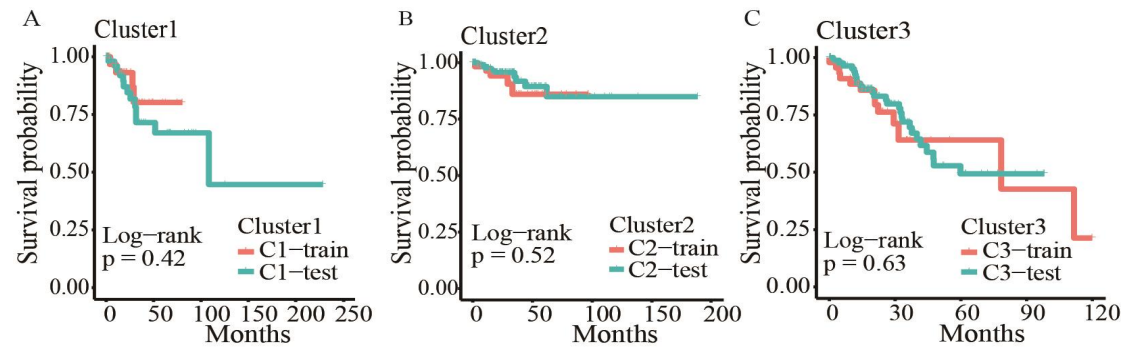

**Figure S1.** Survival curve of the same label cluster in the train sets and test sets. Log-rank was used to test the statistical significance of the difference. There are no significant differences between any groups.
