# Supplementary material for: Excavation of Molecular Subtypes of Endometrial Cancer Based on DNA Methylation
Source: MDPI journal article supplement (doi:10.3390/genes13112106), 2022-11-13
Supplement: s1 [file s1]

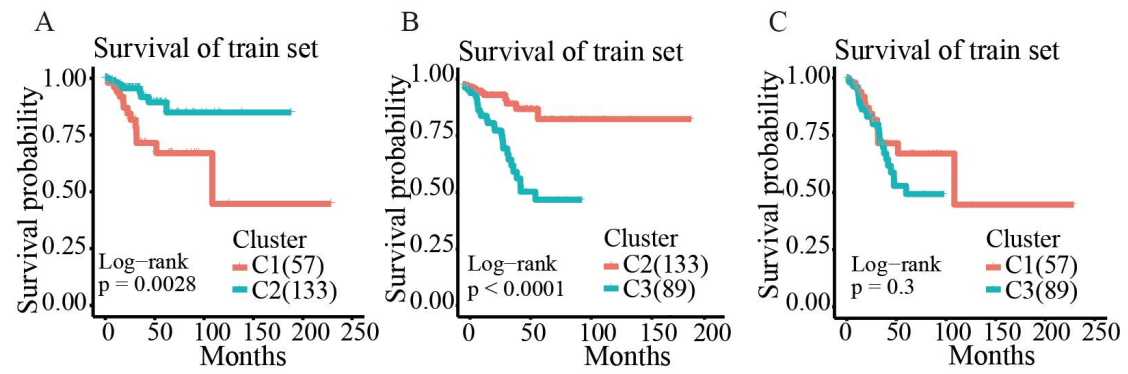

**Figure S3.** Survival curve for each pair of cluster. Log-rank was used to test the statistical significance of the difference. (A) Cluster 1 and cluster 2 had statistically significant outcomes. (B) Cluster 2 and cluster 3 had statistically significant outcomes. (C) The prognosis of cluster 1 and cluster 3 was not statistically significant.
