# Supplementary figures and images for: Excavation of Molecular Subtypes of Endometrial Cancer Based on DNA Methylation
Source: MDPI journal article supplement (doi:10.3390/genes13112106), 2022-11-13

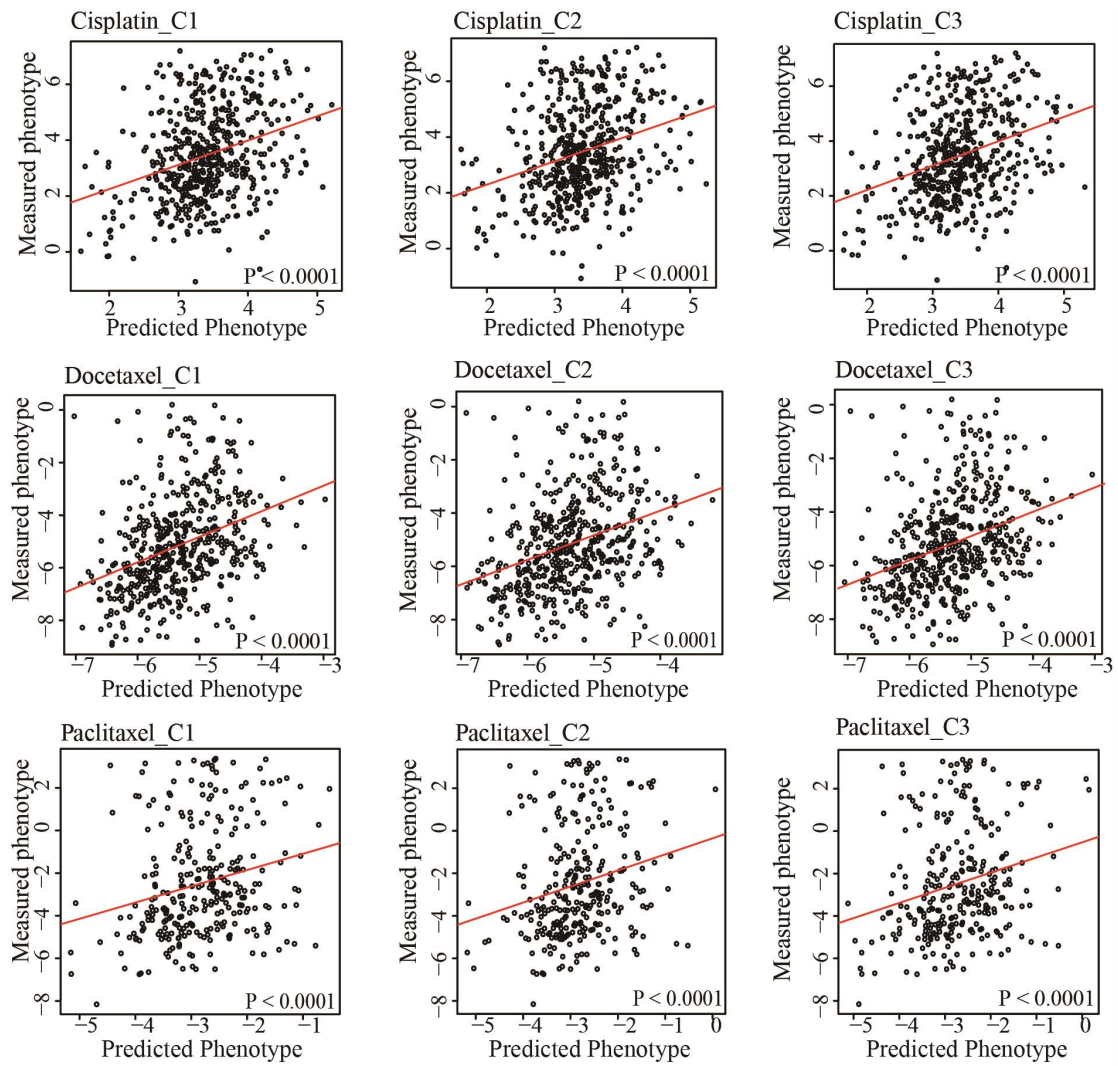

**Figure S4.** Scatter plot shows the level of correlation between the three drugs and each cluster.

Supplement: s1 [file s1]

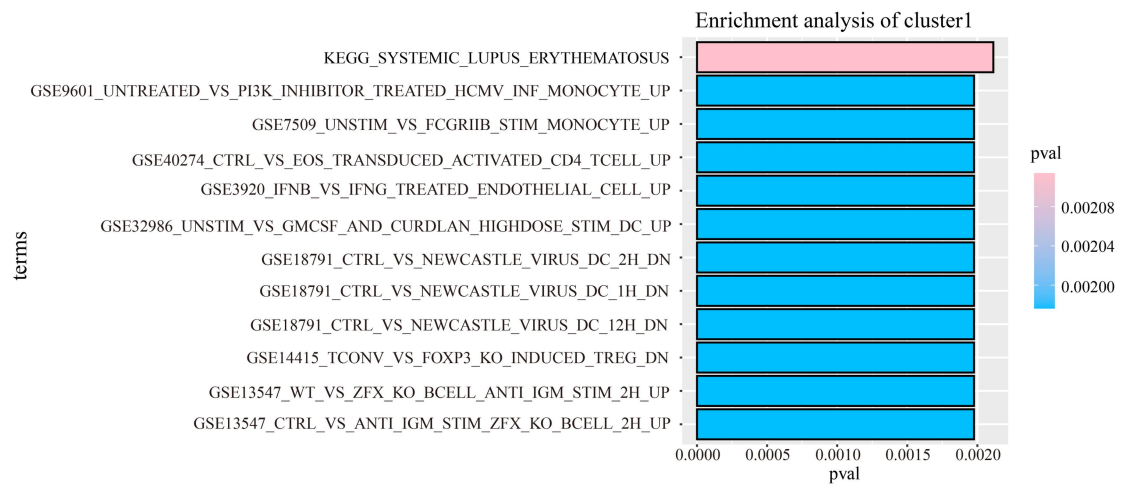

**Figure S2.** Gene enrichment analysis corresponding to specific CpG sites in cluster 1.

Supplement: s1 [file s1]
